# Supplementary material for: Association of Diet, Physical Activity Guidelines and Cardiometabolic Risk Markers in Children
Source: Nutrients. 2021 Aug 25;13(9):2954. doi: 10.3390/nu13092954 (PMC8466174; doi:10.3390/nu13092954)
Supplement: Supplementary file 1 [file nutrients-13-02954-s001.zip › Supplemental Figure S1.pdf]

Included in GENOBX study  
n = 813

Excluded:

- Age n = 36
- Missing food n = 163
- Missing PA n = 24
- Missing food and PA n = 41

Included in final study  
n = 549

Missing data:

- Total fat mass percentage n = 181
- Abdominal fat mass percentage n = 280
- Total lean mass percentage n = 171
- Fat-free mass index n = 180
- Fat mass index n = 180
- Triacylglycerols n = 7
- Cholesterol n = 6
- HDL n = 20
- LDL n = 21
- Insulin n = 30
- HOMA-IR n = 82
- Systolic blood pressure n = 18
- Diastolic blood pressure n = 18
- Metabolic syndrome n = 25
